# Supplementary material
Source: Royal Society of Chemistry journal article supplement (doi:10.1039/d5su00966a)
Supplement: d5su00966a1.pdf [file d5su00966a1.pdf]

## Supplementary Information

"Implementing Sustainable Undergraduate Laboratories Using the IUPAC Guiding Principles of Responsible Chemistry"

|                  |           |        |         |        |       |
|------------------|-----------|--------|---------|--------|-------|
| Type colour key: | equipment | hazard | solvent | status | waste |
|------------------|-----------|--------|---------|--------|-------|

### 1. Data of Figures 1 and 2

| type      | value             | course    | stage              |
|-----------|-------------------|-----------|--------------------|
| equipment | reflux condenser  | CHEM30110 | 3rd Year (Stage 3) |
| equipment | reflux condenser  | CHEM00010 | 1st Year (Stage 1) |
| equipment | rotary evaporator | CHEM20040 | 2nd Year (Stage 2) |
| equipment | rotary evaporator | CHEM20040 | 2nd Year (Stage 2) |
| equipment | reflux condenser  | CHEM20040 | 2nd Year (Stage 2) |
| equipment | reflux condenser  | CHEM20040 | 2nd Year (Stage 2) |
| equipment | rotary evaporator | CHEM20050 | 2nd Year (Stage 2) |
| equipment | reflux condenser  | CHEM20050 | 2nd Year (Stage 2) |
| equipment | reflux condenser  | CHEM20050 | 2nd Year (Stage 2) |
| equipment | reflux condenser  | CHEM20050 | 2nd Year (Stage 2) |
| equipment | reflux condenser  | CHEM20050 | 2nd Year (Stage 2) |
| equipment | reflux condenser  | CHEM20110 | 2nd Year (Stage 2) |
| equipment | reflux condenser  | CHEM10050 | 1st Year (Stage 1) |
| equipment | reflux condenser  | CHEM30220 | 3rd Year (Stage 3) |
| equipment | rotary evaporator | CHEM30220 | 3rd Year (Stage 3) |
| equipment | reflux condenser  | CHEM30260 | 3rd Year (Stage 3) |
| equipment | reflux condenser  | CHEM30360 | 3rd Year (Stage 3) |
| equipment | reflux condenser  | CHEM30360 | 3rd Year (Stage 3) |
| equipment | rotary evaporator | CHEM30110 | 3rd Year (Stage 3) |
| equipment | rotary evaporator | CHEM30110 | 3rd Year (Stage 3) |
| equipment | reflux condenser  | CHEM30110 | 3rd Year (Stage 3) |
| equipment | reflux condenser  | CHEM30110 | 3rd Year (Stage 3) |
| hazard    | Congo red         | CHEM30360 | 3rd Year (Stage 3) |
| hazard    | phenolphthalein   | CHEM30360 | 3rd Year (Stage 3) |
| hazard    | barium            | CHEM10010 | 1st Year (Stage 1) |
| hazard    | barium            | CHEM10010 | 1st Year (Stage 1) |
| hazard    | HCl               | CHEM00010 | 1st Year (Stage 1) |
| hazard    | HCl               | CHEM00010 | 1st Year (Stage 1) |
| hazard    | ammonia           | CHEM00010 | 1st Year (Stage 1) |
| hazard    | HCl               | CHEM00020 | 1st Year (Stage 1) |
| hazard    | NaOH              | CHEM00020 | 1st Year (Stage 1) |
| hazard    | barium            | CHEM00020 | 1st Year (Stage 1) |
| hazard    | HCl               | CHEM00010 | 1st Year (Stage 1) |
| hazard    | HCl               | CHEM00010 | 1st Year (Stage 1) |
| hazard    | HCl               | CHEM00010 | 1st Year (Stage 1) |
| hazard    | bromine           | CHEM10050 | 1st Year (Stage 1) |

| type    | value                          | course    | stage              |
|---------|--------------------------------|-----------|--------------------|
| hazard  | bromine                        | CHEM10050 | 1st Year (Stage 1) |
| hazard  | HCl                            | CHEM20110 | 2nd Year (Stage 2) |
| hazard  | HCl                            | CHEM20110 | 2nd Year (Stage 2) |
| hazard  | acetic acid                    | CHEM20110 | 2nd Year (Stage 2) |
| hazard  | bromine                        | CHEM20110 | 2nd Year (Stage 2) |
| hazard  | HCl                            | CHEM10040 | 1st Year (Stage 1) |
| hazard  | NaOH                           | CHEM10040 | 1st Year (Stage 1) |
| hazard  | phenolphthalein                | CHEM10040 | 1st Year (Stage 1) |
| hazard  | HCl                            | CHEM10130 | 1st Year (Stage 1) |
| hazard  | H <sub>2</sub> SO <sub>4</sub> | CHEM10130 | 1st Year (Stage 1) |
| hazard  | potassium dichromate           | CHEM10130 | 1st Year (Stage 1) |
| hazard  | potassium dichromate           | CHEM10130 | 1st Year (Stage 1) |
| hazard  | NaOH                           | CHEM20030 | 2nd Year (Stage 2) |
| hazard  | H <sub>2</sub> SO <sub>4</sub> | CHEM20040 | 2nd Year (Stage 2) |
| hazard  | HNO <sub>3</sub>               | CHEM20040 | 2nd Year (Stage 2) |
| hazard  | acetic acid                    | CHEM20040 | 2nd Year (Stage 2) |
| hazard  | NaOH                           | CHEM20040 | 2nd Year (Stage 2) |
| hazard  | H <sub>2</sub> SO <sub>4</sub> | CHEM20050 | 2nd Year (Stage 2) |
| hazard  | acetic acid                    | CHEM20050 | 2nd Year (Stage 2) |
| hazard  | bromine                        | CHEM20050 | 2nd Year (Stage 2) |
| hazard  | H <sub>2</sub> SO <sub>4</sub> | CHEM10050 | 1st Year (Stage 1) |
| hazard  | acetic acid                    | CHEM10050 | 1st Year (Stage 1) |
| hazard  | H <sub>2</sub> SO <sub>4</sub> | CHEM10130 | 1st Year (Stage 1) |
| hazard  | H <sub>2</sub> SO <sub>4</sub> | CHEM20090 | 2nd Year (Stage 2) |
| hazard  | ammonia                        | CHEM20090 | 2nd Year (Stage 2) |
| hazard  | acetic acid                    | CHEM10050 | 1st Year (Stage 1) |
| hazard  | Congo red                      | CHEM20120 | 2nd Year (Stage 2) |
| hazard  | Congo red                      | CHEM20120 | 2nd Year (Stage 2) |
| hazard  | HCl                            | CHEM20140 | 2nd Year (Stage 2) |
| hazard  | acetic acid                    | CHEM20140 | 2nd Year (Stage 2) |
| hazard  | NaOH                           | CHEM20140 | 2nd Year (Stage 2) |
| hazard  | HCl                            | CHEM30060 | 3rd Year (Stage 3) |
| hazard  | NaOH                           | CHEM30200 | 3rd Year (Stage 3) |
| hazard  | acetic acid                    | CHEM30210 | 3rd Year (Stage 3) |
| hazard  | HCl                            | CHEM30250 | 3rd Year (Stage 3) |
| hazard  | HCl                            | CHEM30220 | 3rd Year (Stage 3) |
| hazard  | NaOH                           | CHEM30220 | 3rd Year (Stage 3) |
| hazard  | H <sub>2</sub> SO <sub>4</sub> | CHEM30320 | 3rd Year (Stage 3) |
| hazard  | HCl                            | CHEM30360 | 3rd Year (Stage 3) |
| hazard  | bromine                        | CHEM30110 | 3rd Year (Stage 3) |
| hazard  | potassium dichromate           | CHEM30110 | 3rd Year (Stage 3) |
| solvent | water                          | CHEM30360 | 3rd Year (Stage 3) |
| solvent | water                          | CHEM30110 | 3rd Year (Stage 3) |
| solvent | water                          | CHEM30110 | 3rd Year (Stage 3) |
| solvent | water                          | CHEM30110 | 3rd Year (Stage 3) |

| type    | value           | course    | stage              |
|---------|-----------------|-----------|--------------------|
| solvent | water           | CHEM30110 | 3rd Year (Stage 3) |
| solvent | ethanol         | CHEM00010 | 1st Year (Stage 1) |
| solvent | water           | CHEM00010 | 1st Year (Stage 1) |
| solvent | water           | CHEM00010 | 1st Year (Stage 1) |
| solvent | water           | CHEM00010 | 1st Year (Stage 1) |
| solvent | water           | CHEM00010 | 1st Year (Stage 1) |
| solvent | water           | CHEM00020 | 1st Year (Stage 1) |
| solvent | water           | CHEM00020 | 1st Year (Stage 1) |
| solvent | water           | CHEM00020 | 1st Year (Stage 1) |
| solvent | water           | CHEM00010 | 1st Year (Stage 1) |
| solvent | water           | CHEM00010 | 1st Year (Stage 1) |
| solvent | water           | CHEM00010 | 1st Year (Stage 1) |
| solvent | water           | CHEM00010 | 1st Year (Stage 1) |
| solvent | ethanol         | CHEM20110 | 2nd Year (Stage 2) |
| solvent | ethanol         | CHEM20110 | 2nd Year (Stage 2) |
| solvent | water           | CHEM20110 | 2nd Year (Stage 2) |
| solvent | water           | CHEM20110 | 2nd Year (Stage 2) |
| solvent | water           | CHEM10040 | 1st Year (Stage 1) |
| solvent | dichloromethane | CHEM20040 | 2nd Year (Stage 2) |
| solvent | dichloromethane | CHEM20040 | 2nd Year (Stage 2) |
| solvent | methanol        | CHEM20040 | 2nd Year (Stage 2) |
| solvent | acetone         | CHEM20040 | 2nd Year (Stage 2) |
| solvent | ethyl acetate   | CHEM20040 | 2nd Year (Stage 2) |
| solvent | toluene         | CHEM20040 | 2nd Year (Stage 2) |
| solvent | water           | CHEM20040 | 2nd Year (Stage 2) |
| solvent | water           | CHEM20040 | 2nd Year (Stage 2) |
| solvent | water           | CHEM20040 | 2nd Year (Stage 2) |
| solvent | water           | CHEM20040 | 2nd Year (Stage 2) |
| solvent | water           | CHEM20040 | 2nd Year (Stage 2) |
| solvent | water           | CHEM20040 | 2nd Year (Stage 2) |
| solvent | dichloromethane | CHEM20050 | 2nd Year (Stage 2) |
| solvent | dichloromethane | CHEM20050 | 2nd Year (Stage 2) |
| solvent | ethanol         | CHEM20050 | 2nd Year (Stage 2) |
| solvent | methanol        | CHEM20050 | 2nd Year (Stage 2) |
| solvent | methanol        | CHEM20050 | 2nd Year (Stage 2) |
| solvent | ethyl acetate   | CHEM20050 | 2nd Year (Stage 2) |
| solvent | diethyl ether   | CHEM20050 | 2nd Year (Stage 2) |
| solvent | water           | CHEM20050 | 2nd Year (Stage 2) |
| solvent | water           | CHEM20050 | 2nd Year (Stage 2) |
| solvent | water           | CHEM20050 | 2nd Year (Stage 2) |
| solvent | water           | CHEM20050 | 2nd Year (Stage 2) |
| solvent | water           | CHEM10130 | 1st Year (Stage 1) |
| solvent | ethanol         | CHEM20100 | 2nd Year (Stage 2) |
| solvent | water           | CHEM20090 | 2nd Year (Stage 2) |
| solvent | dichloromethane | CHEM20110 | 2nd Year (Stage 2) |



| type    | value           | course    | stage              |
|---------|-----------------|-----------|--------------------|
| solvent | water           | CHEM30110 | 3rd Year (Stage 3) |
| solvent | water           | CHEM30110 | 3rd Year (Stage 3) |
| solvent | water           | CHEM30110 | 3rd Year (Stage 3) |
| solvent | water           | CHEM30110 | 3rd Year (Stage 3) |
| solvent | water           | CHEM30110 | 3rd Year (Stage 3) |
| solvent | water           | CHEM30110 | 3rd Year (Stage 3) |
| status  | implemented     | CHEM30360 | 3rd Year (Stage 3) |
| status  | implemented     | CHEM30360 | 3rd Year (Stage 3) |
| status  | proposed        | CHEM30360 | 3rd Year (Stage 3) |
| status  | proposed        | CHEM30360 | 3rd Year (Stage 3) |
| status  | proposed        | CHEM30360 | 3rd Year (Stage 3) |
| status  | proposed        | CHEM30360 | 3rd Year (Stage 3) |
| status  | implemented     | CHEM10010 | 1st Year (Stage 1) |
| status  | proposed        | CHEM10010 | 1st Year (Stage 1) |
| status  | proposed        | CHEM10010 | 1st Year (Stage 1) |
| status  | implemented     | CHEM30110 | 3rd Year (Stage 3) |
| status  | proposed        | CHEM30110 | 3rd Year (Stage 3) |
| status  | proposed        | CHEM30110 | 3rd Year (Stage 3) |
| status  | proposed        | CHEM30110 | 3rd Year (Stage 3) |
| status  | proposed        | CHEM00010 | 1st Year (Stage 1) |
| status  | implemented     | CHEM00010 | 1st Year (Stage 1) |
| status  | proposed        | CHEM00010 | 1st Year (Stage 1) |
| status  | implemented     | CHEM20110 | 2nd Year (Stage 2) |
| status  | proposed        | CHEM10040 | 1st Year (Stage 1) |
| status  | proposed        | CHEM10130 | 1st Year (Stage 1) |
| status  | proposed        | CHEM10130 | 1st Year (Stage 1) |
| status  | proposed        | CHEM30110 | 3rd Year (Stage 3) |
| status  | implemented     | CHEM30110 | 3rd Year (Stage 3) |
| status  | implemented     | CHEM30110 | 3rd Year (Stage 3) |
| status  | implemented     | CHEM30110 | 3rd Year (Stage 3) |
| status  | proposed        | CHEM30110 | 3rd Year (Stage 3) |
| status  | proposed        | CHEM30110 | 3rd Year (Stage 3) |
| status  | proposed        | CHEM30110 | 3rd Year (Stage 3) |
| status  | proposed        | CHEM30110 | 3rd Year (Stage 3) |
| status  | proposed        | CHEM30110 | 3rd Year (Stage 3) |
| status  | proposed        | CHEM30110 | 3rd Year (Stage 3) |
| waste   | down_sink       | CHEM30360 | 3rd Year (Stage 3) |
| waste   | down_sink       | CHEM30360 | 3rd Year (Stage 3) |
| waste   | haz_halogenated | CHEM30360 | 3rd Year (Stage 3) |
| waste   | down_sink       | CHEM10010 | 1st Year (Stage 1) |
| waste   | down_sink       | CHEM10010 | 1st Year (Stage 1) |
| waste   | down_sink       | CHEM00010 | 1st Year (Stage 1) |
| waste   | down_sink       | CHEM00020 | 1st Year (Stage 1) |
| waste   | down_sink       | CHEM00020 | 1st Year (Stage 1) |
| waste   | down_sink       | CHEM00020 | 1st Year (Stage 1) |
| waste   | down_sink       | CHEM00020 | 1st Year (Stage 1) |

| type  | value              | course    | stage              |
|-------|--------------------|-----------|--------------------|
| waste | down_sink          | CHEM00010 | 1st Year (Stage 1) |
| waste | down_sink          | CHEM00010 | 1st Year (Stage 1) |
| waste | haz_halogenated    | CHEM00010 | 1st Year (Stage 1) |
| waste | down_sink          | CHEM00010 | 1st Year (Stage 1) |
| waste | haz_halogenated    | CHEM20110 | 2nd Year (Stage 2) |
| waste | haz_nonhalogenated | CHEM20040 | 2nd Year (Stage 2) |
| waste | haz_nonhalogenated | CHEM20040 | 2nd Year (Stage 2) |
| waste | haz_nonhalogenated | CHEM20040 | 2nd Year (Stage 2) |
| waste | haz_halogenated    | CHEM20040 | 2nd Year (Stage 2) |
| waste | haz_halogenated    | CHEM20040 | 2nd Year (Stage 2) |
| waste | haz_halogenated    | CHEM20040 | 2nd Year (Stage 2) |
| waste | haz_halogenated    | CHEM20040 | 2nd Year (Stage 2) |
| waste | haz_halogenated    | CHEM20040 | 2nd Year (Stage 2) |
| waste | haz_halogenated    | CHEM20040 | 2nd Year (Stage 2) |
| waste | haz_halogenated    | CHEM20040 | 2nd Year (Stage 2) |
| waste | haz_halogenated    | CHEM20040 | 2nd Year (Stage 2) |
| waste | haz_halogenated    | CHEM20040 | 2nd Year (Stage 2) |
| waste | down_sink          | CHEM00010 | 1st Year (Stage 1) |
| waste | down_sink          | CHEM10130 | 1st Year (Stage 1) |
| waste | down_sink          | CHEM10130 | 1st Year (Stage 1) |
| waste | haz_halogenated    | CHEM20110 | 2nd Year (Stage 2) |
| waste | down_sink          | CHEM10050 | 1st Year (Stage 1) |
| waste | down_sink          | CHEM20120 | 2nd Year (Stage 2) |
| waste | down_sink          | CHEM20140 | 2nd Year (Stage 2) |
| waste | haz_nonhalogenated | CHEM20140 | 2nd Year (Stage 2) |
| waste | haz_halogenated    | CHEM20140 | 2nd Year (Stage 2) |
| waste | red_bin            | CHEM20140 | 2nd Year (Stage 2) |
| waste | haz_nonhalogenated | CHEM30060 | 3rd Year (Stage 3) |
| waste | haz_halogenated    | CHEM30060 | 3rd Year (Stage 3) |
| waste | down_sink          | CHEM30110 | 3rd Year (Stage 3) |
| waste | haz_nonhalogenated | CHEM20110 | 2nd Year (Stage 2) |
| waste | haz_halogenated    | CHEM20110 | 2nd Year (Stage 2) |
| waste | haz_halogenated    | CHEM20110 | 2nd Year (Stage 2) |
| waste | red_bin            | CHEM20110 | 2nd Year (Stage 2) |
| waste | haz_nonhalogenated | CHEM30210 | 3rd Year (Stage 3) |
| waste | haz_halogenated    | CHEM30210 | 3rd Year (Stage 3) |
| waste | red_bin            | CHEM30250 | 3rd Year (Stage 3) |
| waste | red_bin            | CHEM30250 | 3rd Year (Stage 3) |
| waste | haz_halogenated    | CHEM30260 | 3rd Year (Stage 3) |
| waste | haz_nonhalogenated | CHEM30270 | 3rd Year (Stage 3) |
| waste | haz_halogenated    | CHEM30270 | 3rd Year (Stage 3) |
| waste | down_sink          | CHEM30310 | 3rd Year (Stage 3) |
| waste | red_bin            | CHEM30310 | 3rd Year (Stage 3) |
| waste | down_sink          | CHEM30320 | 3rd Year (Stage 3) |
| waste | haz_halogenated    | CHEM30360 | 3rd Year (Stage 3) |
| waste | red_bin            | CHEM30360 | 3rd Year (Stage 3) |

| type  | value              | course    | stage              |
|-------|--------------------|-----------|--------------------|
| waste | haz_nonhalogenated | CHEM30110 | 3rd Year (Stage 3) |
| waste | haz_halogenated    | CHEM30110 | 3rd Year (Stage 3) |
| waste | haz_halogenated    | CHEM30110 | 3rd Year (Stage 3) |
| waste | haz_halogenated    | CHEM30110 | 3rd Year (Stage 3) |
| waste | haz_halogenated    | CHEM30110 | 3rd Year (Stage 3) |
| waste | haz_halogenated    | CHEM30110 | 3rd Year (Stage 3) |

## 2. Data of Figure 3

| Module Information |
|--------------------|
| CHEM00010          |
| CHEM00020          |
| CHEM10030          |
| CHEM10150          |
| CHEM10040          |
| CHEM10050          |
| CHEM10130          |
| CHEM10010          |
| CHEM20030          |
| CHEM20040          |
| CHEM20050          |
| CHEM20060          |
| CHEM20080          |
| CHEM20090          |
| CHEM20100          |
| CHEM20110          |
| CHEM20120          |
| CHEM20140          |
| CHEM30060          |
| CHEM30110          |
| CHEM30200          |
| CHEM30210          |
| CHEM30220          |
| CHEM30230          |
| CHEM30250          |
| CHEM30260          |
| CHEM30270          |
| CHEM30310          |
| CHEM30320          |
| CHEM30360          |

## 3. Data of Figure 4

| Implements                                                                                                                                                                                                           | Implementation Difficulty | IUPAC Responsible Chemistry Benefit |
|----------------------------------------------------------------------------------------------------------------------------------------------------------------------------------------------------------------------|---------------------------|-------------------------------------|
| This includes the use of gloves when not necessary (handling of safe chemicals) as well as throwing away clean/uncontaminated gloves when these can be safely reused (within the same session, not on the long term) | 4                         | 7                                   |
| identify where liquid chemical wastes should be disposed of                                                                                                                                                          | 6                         | 7.5                                 |
| This generated the formation of large volumes of contaminated glass.                                                                                                                                                 | 5                         | 6                                   |
| pH indicators some of the indicators traditionally used are toxic for the environment                                                                                                                                | 2                         | 7.5                                 |
| sucrose used in an experiment was found to be excessive                                                                                                                                                              | 2                         | 5.5                                 |
| the mother solution was made in an inadequate and too large volume of solvent.                                                                                                                                       | 2                         | 6                                   |
| plastic/disposable cuvettes                                                                                                                                                                                          | 4                         | 6.5                                 |
| printers                                                                                                                                                                                                             | 3                         | 6.5                                 |
| a second Gas-Chromatography                                                                                                                                                                                          | 7                         | 6.5                                 |
| Atomic Absorption Spectroscopy (AAS)                                                                                                                                                                                 | 7                         | 6                                   |
| other equipment and machinery                                                                                                                                                                                        | 6                         | 6.5                                 |
| "reflux." prevent waste of large volumes of solvent but large consumption of water. Water less condensers, use air                                                                                                   | 9                         | 7.5                                 |
| "use of syringes/needles"                                                                                                                                                                                            | 4                         | 7                                   |
| Long prepare for the flowing sessions                                                                                                                                                                                | 5                         | 6                                   |
| Cyrene was proposed as an alternative for dimethylformamide                                                                                                                                                          | 4                         | 8                                   |

## 4. Data of Figure 5

| Floor        | Implements                                                                                                                                                                                                           | State       | Catalog               |
|--------------|----------------------------------------------------------------------------------------------------------------------------------------------------------------------------------------------------------------------|-------------|-----------------------|
| physical     | This includes the use of gloves when not necessary (handling of safe chemicals) as well as throwing away clean/uncontaminated gloves when these can be safely reused (within the same session, not on the long term) | long term   | protocol optimisation |
| physical     | identify where liquid chemical wastes should be disposed of                                                                                                                                                          | long term   | protocol optimisation |
| physical     | This generated the formation of large volumes of contaminated glass.                                                                                                                                                 | implemented | protocol optimisation |
| physical     | pH indicators some of the indicators traditionally used are toxic for the environment                                                                                                                                | in process  | chemical substitution |
| physical     | sucrose used in an experiment was found to be excessive                                                                                                                                                              | implemented | protocol optimisation |
| physical     | the mother solution was made in an inadequate and too large volume of solvent.                                                                                                                                       | implemented | protocol optimisation |
| introductory | plastic/disposable cuvettes                                                                                                                                                                                          | in process  | equipment upgrade     |
| introductory | printers                                                                                                                                                                                                             | long term   | protocol optimisation |
| introductory | a second Gas-Chromatography                                                                                                                                                                                          | in process  | equipment upgrade     |
| introductory | Atomic Absorption Spectroscopy (AAS)                                                                                                                                                                                 | in process  | equipment upgrade     |
| introductory | other equipment and machinery                                                                                                                                                                                        | in process  | equipment upgrade     |
| synthetic    | "reflux." prevent waste of large volumes of solvent but large consumption of water. Water less condensers, use air                                                                                                   | implemented | equipment upgrade     |
| synthetic    | "use of syringes/needles"                                                                                                                                                                                            | implemented | protocol optimisation |
| synthetic    | Long prepare for the flowing sessions                                                                                                                                                                                | long term   | protocol optimisation |
| synthetic    | Cyrene was proposed as an alternative for dimethylformamide                                                                                                                                                          | in process  | chemical substitution |

## 5. Data of Figure 9

| Implements                                                                                                                                                                                                           | P 1 | P 2 | P 3 | P 4 | P 5 | P 6 | P 7 | P 8 |
|----------------------------------------------------------------------------------------------------------------------------------------------------------------------------------------------------------------------|-----|-----|-----|-----|-----|-----|-----|-----|
| This includes the use of gloves when not necessary (handling of safe chemicals) as well as throwing away clean/uncontaminated gloves when these can be safely reused (within the same session, not on the long term) | 4   | 4   | 3   | 3   | 3   | 3   | 3   | 2   |
| identify where liquid chemical wastes should be disposed of                                                                                                                                                          | 3   | 5   | 4   | 3   | 4   | 3   | 3   | 2   |
| This generated the formation of large volumes of contaminated glass.                                                                                                                                                 | 3   | 4   | 3   | 2   | 3   | 2   | 3   | 2   |
| pH indicators some of the indicators traditionally used are toxic for the environment                                                                                                                                | 4   | 5   | 4   | 2   | 3   | 2   | 4   | 2   |
| sucrose used in an experiment was found to be excessive                                                                                                                                                              | 3   | 3   | 3   | 2   | 2   | 2   | 3   | 1   |
| the mother solution was made in an inadequate and too large volume of solvent.                                                                                                                                       | 3   | 4   | 3   | 2   | 2   | 2   | 4   | 1   |
| plastic/disposable cuvettes                                                                                                                                                                                          | 3   | 4   | 3   | 2   | 3   | 3   | 3   | 1   |
| printers                                                                                                                                                                                                             | 3   | 4   | 3   | 3   | 4   | 3   | 3   | 2   |
| a second Gas-Chromatography                                                                                                                                                                                          | 3   | 3   | 3   | 3   | 3   | 4   | 4   | 3   |
| Atomic Absorption Spectroscopy (AAS)                                                                                                                                                                                 | 3   | 3   | 3   | 3   | 3   | 3   | 4   | 3   |
| other equipment and machinery                                                                                                                                                                                        | 3   | 4   | 3   | 3   | 3   | 3   | 3   | 2   |
| "reflux." prevent waste of large volumes of solvent but large consumption of water. Water less condensers, use air                                                                                                   | 4   | 5   | 4   | 2   | 3   | 2   | 3   | 2   |
| "use of syringes/needles"                                                                                                                                                                                            | 3   | 4   | 4   | 3   | 3   | 3   | 3   | 2   |
| Long prepare for the flowing sessions                                                                                                                                                                                | 3   | 3   | 3   | 3   | 4   | 3   | 3   | 3   |
| Cyrene was proposed as an alternative for dimethylformamide                                                                                                                                                          | 5   | 5   | 4   | 2   | 3   | 2   | 4   | 3   |
